# Supplementary material for: Adiponectin is associated with cardio-metabolic traits in Mexican children
Source: PubMed Central journal article supplement (PMC6395686; doi:10.1038/s41598-019-39801-2), 2019-02-28
Supplement: 41598_2019_39801_MOESM1_ESM.pdf [file 41598_2019_39801_MOESM1_ESM.pdf]

# **Adiponectin is associated with cardio-metabolic traits in Mexican children**

**Juehua He<sup>1,a</sup>, Carolina Stryjecki<sup>1,a</sup>, Hudson Reddon<sup>1</sup>, Jesus Peralta-Romero<sup>2</sup>,  
Roberto Karam-Araujo<sup>3</sup>, Fernando Suarez<sup>2</sup>, Jaime Gomez-Zamudio<sup>2</sup>, Ana Burguete-  
Garcia<sup>4</sup>, Akram Alyass<sup>1</sup>, Miguel Cruz<sup>2,\*</sup>, David Meyre<sup>1,5,\*</sup>**

<sup>a</sup>These authors contributed equally to this work

<sup>1</sup>Department of Health Research Methods, Evidence, and Impact, McMaster University, Hamilton, Canada

<sup>2</sup>Medical Research Unit in Biochemistry, Hospital de Especialidades, Centro Médico Nacional Siglo XXI del Instituto Mexicano del Seguro Social, Mexico City, Mexico

<sup>3</sup>Health Promotion Division, Instituto Mexicano del Seguro Social, Mexico City, Mexico

<sup>4</sup>Centro de investigación sobre enfermedades infecciosas. Instituto Nacional de Salud Pública. Cuernavaca, Morelos, Mexico

<sup>5</sup>Department of Pathology and Molecular Medicine, McMaster University, Hamilton, Canada

## **Corresponding authors\*:**

Dr. David Meyre. Department of Clinical Epidemiology and Biostatistics, McMaster University, Room 3205, Michael DeGroote Centre for Learning & Discovery, 1280 Main Street West, Hamilton, ON L8S 4K1, Canada. Tel: 905.525.9140 Ext. 26802. Fax: 905.528.2814. Email: [meyre@mcmaster.ca](mailto:meyre@mcmaster.ca). Dr. Miguel Cruz, Unidad de Investigación Médica en Bioquímica, Hospital de Especialidades Centro Médico Nacional Siglo XXI, Instituto Mexicano del Seguro Social, Av. Cuauhtémoc, 330 C.P. 06725, México, D.F. Tel: 52 55 57612358; Fax: 5255 56276914. Email: [mcruz@yahoo.com](mailto:mcruz@yahoo.com)

**Supplementary Table S1: Description of the six adiponectin SNPs studied**

| SNP ( <i>Gene</i> )           | Major / Minor Allele | Mexican children allele count |      | 1000 Genomes allele count |    | 1000G MAF | Study MAF | Call Rate | HWE P-value | Allele count Chi <sup>2</sup> (P-value) |
|-------------------------------|----------------------|-------------------------------|------|---------------------------|----|-----------|-----------|-----------|-------------|-----------------------------------------|
|                               |                      | G                             | A    | G                         | A  |           |           |           |             |                                         |
| rs10920533 ( <i>ADIOPR1</i> ) | G / A                | G                             | A    | G                         | A  | 0.11      | 0.11      | 0.966     | 0.35        | 0.02 (0.89)                             |
|                               |                      | 2519                          | 297  | 114                       | 14 |           |           |           |             |                                         |
| rs11061971 ( <i>ADIPOR2</i> ) | T / A                | T                             | A    | T                         | A  | 0.42      | 0.36      | 0.982     | 0.97        | 2.01 (0.16)                             |
|                               |                      | 1831                          | 1031 | 74                        | 54 |           |           |           |             |                                         |
| rs182052 ( <i>ADIPOQ</i> )    | G / A                | G                             | A    | G                         | A  | 0.47      | 0.53      | 0.984     | 0.76        | 2.11 (0.15)                             |
|                               |                      | 1336                          | 1532 | 68                        | 60 |           |           |           |             |                                         |
| rs2241766 ( <i>ADIPOQ</i> )   | T / G                | T                             | G    | T                         | G  | 0.14      | 0.18      | 0.972     | 0.67        | 1.61 (0.21)                             |
|                               |                      | 2310                          | 524  | 110                       | 18 |           |           |           |             |                                         |
| rs266729 ( <i>ADIPOQ</i> )    | C / G                | C                             | G    | C                         | G  | 0.30      | 0.38      | 0.989     | 0.61        | 3.22 (0.07)                             |
|                               |                      | 1776                          | 1104 | 89                        | 39 |           |           |           |             |                                         |
| rs822393 ( <i>ADIPOQ</i> )    | C / T                | C                             | T    | C                         | T  | 0.41      | 0.43      | 0.986     | 0.38        | 1.43 (0.23)                             |
|                               |                      | 1529                          | 1345 | 75                        | 53 |           |           |           |             |                                         |

Abbreviations, HWE, Hardy-Weinberg equilibrium; MAF, minor allele frequency; SNP, single nucleotide polymorphism. Pearson's Chi<sup>2</sup> test was used to compare the allele counts of our study with the reference counts from 1000G.

**Supplementary Table S2: Sample sizes needed to detect significant association between serum adiponectin and the six SNPs with a power of 80% and a two-sided p-value of  $8.3 \times 10^{-3}$  (adjusted for multiple testing) by beta coefficient and allele frequency for risk allele**

| Allelic beta | Minor allele frequency |       |       |      |      |      |      |
|--------------|------------------------|-------|-------|------|------|------|------|
|              | 0.01                   | 0.05  | 0.1   | 0.2  | 0.3  | 0.4  | 0.5  |
| 0.10         | 92594                  | 19294 | 10180 | 5724 | 4359 | 3814 | 3661 |
| 0.20         | 23144                  | 4819  | 2540  | 1426 | 1085 | 949  | 911  |
| 0.30         | 10283                  | 2138  | 1126  | 631  | 479  | 418  | 401  |
| 0.40         | 5781                   | 1200  | 631   | 352  | 267  | 233  | 223  |
| 0.50         | 3698                   | 766   | 401   | 223  | 168  | 147  | 141  |
| 0.60         | 2566                   | 530   | 277   | 153  | 115  | 100  | 96   |
| 0.70         | 1884                   | 388   | 202   | 111  | 83   | 72   | 69   |
| 0.80         | 1441                   | 295   | 153   | 83   | 62   | 53   | 51   |
| 0.90         | 1137                   | 232   | 120   | 64   | 48   | 41   | 39   |
| 1.00         | 920                    | 187   | 96    | 51   | 37   | 32   | 30   |
| 1.50         | 405                    | 80    | 39    | 19   | 12   | 10   | 9    |
| 2.00         | 225                    | 42    | 19    | 6    | < 1  | < 1  | < 1  |
| 2.50         | 142                    | 24    | 9     | < 1  | < 1  | < 1  | < 1  |
| 3.00         | 97                     | 15    | < 1   | < 1  | < 1  | < 1  | < 1  |
| 3.50         | 69                     | 8     | < 1   | < 1  | < 1  | < 1  | < 1  |

Abbreviations: SBP, systolic blood pressure; SNP: single nucleotide polymorphism. Calculations are based on serum adiponectin mean 5.26 and standard deviation 1.23.

**Supplementary Table S3: Sample sizes needed in a cohort design to detect significant association between serum adiponectin and SBP across a range of beta coefficients with statistical power of 80% and two-sided p-values of 0.05 (unadjusted) and  $4.2 \times 10^{-3}$  (adjusted for multiple testing)**

| $\beta$ | P=0.05 | P= $4.2 \times 10^{-3}$ |
|---------|--------|-------------------------|
| 0.10    | 61183  | 107112                  |
| 0.20    | 15293  | 26773                   |
| 0.30    | 6795   | 11895                   |
| 0.40    | 3820   | 6688                    |
| 0.50    | 2444   | 4278                    |
| 0.60    | 1696   | 2969                    |
| 0.70    | 1245   | 2179                    |
| 0.80    | 952    | 1667                    |
| 0.90    | 751    | 1316                    |
| 1.00    | 608    | 1064                    |
| 1.10    | 502    | 878                     |
| 1.20    | 421    | 737                     |
| 1.30    | 358    | 627                     |
| 1.40    | 308    | 540                     |
| 1.50    | 268    | 469                     |

Abbreviation: SBP, systolic blood pressure. Calculations are based on serum adiponectin standard deviation 1.23, SBP mean 98.57 and standard deviation 10.86.

**Supplementary Table S4: Number of cases per 10 controls to detect significant association between serum adiponectin and IR across a range of beta coefficients with statistical power of 80% and two-sided p-values of 0.05 (unadjusted) and  $4.2 \times 10^{-3}$  (adjusted for multiple testing)**

| <b>OR</b> | <b>P=0.05</b> | <b>P=<math>4.2 \times 10^{-3}</math></b> |
|-----------|---------------|------------------------------------------|
| 1.10      | 629           | 1102                                     |
| 1.20      | 173           | 303                                      |
| 1.30      | 84            | 147                                      |
| 1.40      | 52            | 91                                       |
| 1.50      | 36            | 63                                       |
| 1.60      | 27            | 48                                       |
| 1.70      | 22            | 38                                       |
| 1.80      | 18            | 31                                       |
| 1.90      | 15            | 27                                       |
| 2.00      | 13            | 23                                       |
| 2.10      | 12            | 21                                       |
| 2.20      | 11            | 19                                       |
| 2.30      | 10            | 17                                       |
| 2.40      | 9             | 16                                       |
| 2.50      | 8             | 15                                       |

Abbreviation: IR, insulin resistance. Calculations are based on serum adiponectin standard deviation 1.23, and 11% baseline risk for IR.

**Supplementary Table S5: Sample sizes needed in a cohort design to detect significant association between the six SNPs and SBP with statistical power of 80% and two-sided p-values of 0.05 (unadjusted) and  $6.9 \times 10^{-4}$  (adjusted for multiple testing) across a range of beta coefficients and allele frequencies for risk allele**

| $\beta$ | <b>P=0.05</b>                 |        |        |        |        | <b>P=<math>6.9 \times 10^{-4}</math></b> |          |        |        |        |
|---------|-------------------------------|--------|--------|--------|--------|------------------------------------------|----------|--------|--------|--------|
|         | <b>Minor allele frequency</b> |        |        |        |        | <b>Minor allele frequency</b>            |          |        |        |        |
|         | 0.05                          | 0.10   | 0.20   | 0.40   | 0.50   | 0.05                                     | 0.10     | 0.20   | 0.40   | 0.50   |
| 0.10    | 974411                        | 514270 | 289275 | 192849 | 185135 | >1000000                                 | >1000000 | 660515 | 440340 | 422726 |
| 0.20    | 243600                        | 128565 | 72316  | 48209  | 46281  | 556222                                   | 293557   | 165122 | 110078 | 105675 |
| 0.30    | 108264                        | 57138  | 32138  | 21424  | 20567  | 247205                                   | 130465   | 73383  | 48919  | 46962  |
| 0.40    | 60897                         | 32138  | 18076  | 12049  | 11567  | 139049                                   | 73383    | 41274  | 27513  | 26412  |
| 0.50    | 38973                         | 20567  | 11567  | 7710   | 7402   | 88988                                    | 46962    | 26412  | 17605  | 16900  |
| 0.60    | 27063                         | 14281  | 8032   | 5353   | 5139   | 61794                                    | 32610    | 18339  | 12223  | 11734  |
| 0.70    | 19882                         | 10491  | 5900   | 3932   | 3774   | 45398                                    | 23956    | 13471  | 8978   | 8618   |
| 0.80    | 15221                         | 8032   | 4516   | 3009   | 2889   | 34755                                    | 18339    | 10312  | 6871   | 6596   |
| 0.90    | 12026                         | 6345   | 3567   | 2377   | 2282   | 27459                                    | 14488    | 8146   | 5427   | 5210   |
| 1.00    | 9740                          | 5139   | 2889   | 1925   | 1847   | 22240                                    | 11734    | 6596   | 4395   | 4218   |
| 1.50    | 4327                          | 2282   | 1282   | 853    | 819    | 9880                                     | 5210     | 2927   | 1948   | 1870   |
| 2.00    | 2432                          | 1282   | 719    | 478    | 459    | 5553                                     | 2927     | 1642   | 1092   | 1048   |
| 2.50    | 1555                          | 819    | 459    | 305    | 292    | 3551                                     | 1870     | 1048   | 696    | 667    |
| 3.00    | 1079                          | 567    | 317    | 210    | 202    | 2463                                     | 1296     | 725    | 480    | 461    |
| 3.50    | 792                           | 416    | 232    | 153    | 147    | 1807                                     | 950      | 530    | 350    | 336    |

Abbreviation: SBP, systolic blood pressure; SNP, single nucleotide polymorphism. Calculations are based on SBP mean 98.57 and standard deviation 10.86.

**Supplementary Table S6: Number of cases per 10 controls to detect significant association between the six SNPs and IR with statistical power of 80% and two-sided p-values of 0.05 (unadjusted) and  $6.9 \times 10^{-4}$  (adjusted for multiple testing) across a range of beta coefficients and allele frequencies for risk allele**

| OR   | P=0.05                 |      |      |      |      | P= $6.9 \times 10^{-4}$ |       |      |      |      |
|------|------------------------|------|------|------|------|-------------------------|-------|------|------|------|
|      | Minor allele frequency |      |      |      |      | Minor allele frequency  |       |      |      |      |
|      | 0.05                   | 0.10 | 0.20 | 0.40 | 0.50 | 0.05                    | 0.10  | 0.20 | 0.40 | 0.50 |
| 1.10 | 9568                   | 5076 | 2885 | 1963 | 1903 | 21865                   | 11601 | 6593 | 4485 | 4345 |
| 1.20 | 2513                   | 1340 | 769  | 533  | 522  | 5743                    | 3063  | 1758 | 1219 | 1191 |
| 1.30 | 1171                   | 628  | 364  | 257  | 253  | 2677                    | 1435  | 832  | 586  | 578  |
| 1.40 | 690                    | 372  | 217  | 156  | 155  | 1576                    | 849   | 497  | 356  | 353  |
| 1.50 | 461                    | 250  | 148  | 107  | 107  | 1055                    | 571   | 337  | 245  | 245  |
| 1.60 | 335                    | 182  | 108  | 80   | 80   | 765                     | 416   | 248  | 183  | 183  |
| 1.70 | 256                    | 140  | 84   | 63   | 63   | 586                     | 320   | 193  | 144  | 145  |
| 1.80 | 204                    | 112  | 64   | 51   | 52   | 467                     | 257   | 156  | 117  | 119  |
| 1.90 | 168                    | 93   | 57   | 43   | 44   | 384                     | 212   | 130  | 99   | 100  |
| 2.00 | 142                    | 79   | 48   | 37   | 38   | 324                     | 180   | 111  | 85   | 87   |
| 2.10 | 122                    | 68   | 42   | 33   | 33   | 278                     | 155   | 96   | 75   | 76   |
| 2.20 | 106                    | 59   | 37   | 29   | 30   | 242                     | 136   | 85   | 66   | 68   |
| 2.30 | 94                     | 53   | 33   | 26   | 27   | 214                     | 121   | 76   | 60   | 61   |
| 2.40 | 84                     | 47   | 30   | 24   | 24   | 191                     | 108   | 69   | 55   | 56   |
| 2.50 | 76                     | 43   | 27   | 22   | 22   | 173                     | 98    | 63   | 50   | 51   |
| 3.00 | 50                     | 29   | 19   | 16   | 16   | 115                     | 67    | 44   | 36   | 37   |
| 3.50 | 37                     | 22   | 15   | 12   | 13   | 85                      | 51    | 34   | 29   | 29   |

Abbreviation: IR, insulin resistance; SNP, single nucleotide polymorphism. Calculations are based on 11% baseline risk for IR.

**Supplementary Table S7: Correlation table for continuous cardio-metabolic traits showing Pearson's correlation coefficient and associated p-values**

|                | <b>BMI</b>                         | <b>SDS-BMI</b>                     | <b>WHR</b>                         | <b>SDS-WHR</b>                     | <b>SBP</b>                         | <b>SDS-SBP</b>                    | <b>DBP</b>                        | <b>SDS-DBP</b>                    |
|----------------|------------------------------------|------------------------------------|------------------------------------|------------------------------------|------------------------------------|-----------------------------------|-----------------------------------|-----------------------------------|
| <b>BMI</b>     | 1                                  | 0.86 (0.00)                        | 0.48<br>(1.00x10 <sup>-13</sup> )  | -0.10<br>(1.46x10 <sup>-4</sup> )  | 0.40 (0.00)                        | 0.22<br>(1.00x10 <sup>-13</sup> ) | 0.29<br>(1.00x10 <sup>-13</sup> ) | 0.14<br>(2.42x10 <sup>-7</sup> )  |
| <b>SDS-BMI</b> | 0.86 (0.00)                        | 1                                  | 0.54<br>(1.00x10 <sup>-13</sup> )  | 0.17<br>(1.19x10 <sup>-10</sup> )  | 0.28 (0.00)                        | 0.22<br>(1.02x10 <sup>-13</sup> ) | 0.20<br>(1.06x10 <sup>-13</sup> ) | 0.15<br>(7.04x10 <sup>-13</sup> ) |
| <b>WHR</b>     | 0.48<br>(1.00x10 <sup>-13</sup> )  | 0.54<br>(1.00x10 <sup>-13</sup> )  | 1                                  | 0.43<br>(1.00x10 <sup>-13</sup> )  | 0.08<br>(2.00x10 <sup>-3</sup> )   | 0.13<br>(2.93x10 <sup>-6</sup> )  | 0.04 (0.09)                       | 0.09<br>(2.00x10 <sup>-3</sup> )  |
| <b>SDS-WHR</b> | -0.10<br>(1.46x10 <sup>-4</sup> )  | 0.17<br>(1.19x10 <sup>-10</sup> )  | 0.43<br>(1.00x10 <sup>-13</sup> )  | 1                                  | -0.26<br>(1.00x10 <sup>-13</sup> ) | 0.03 (0.28)                       | -0.15<br>(3.80x10 <sup>-8</sup> ) | 0.07 (0.01)                       |
| <b>SBP</b>     | 0.40<br>(1.00x10 <sup>-13</sup> )  | 0.28<br>(1.00x10 <sup>-13</sup> )  | 0.08<br>(2.00x10 <sup>-3</sup> )   | -0.26<br>(1.00x10 <sup>-13</sup> ) | 1                                  | 0.92 (0.00)                       | 0.63<br>(1.00x10 <sup>-13</sup> ) | 0.53<br>(1.00x10 <sup>-13</sup> ) |
| <b>SDS-SBP</b> | 0.22<br>(1.00x10 <sup>-13</sup> )  | 0.22<br>(1.02x10 <sup>-13</sup> )  | 0.13<br>(3.00x10 <sup>-6</sup> )   | 0.03 (0.28)                        | 0.92 (0.00)                        | 1                                 | 0.57<br>(1.00x10 <sup>-13</sup> ) | 0.62<br>(1.00x10 <sup>-13</sup> ) |
| <b>DBP</b>     | 0.29<br>(1.00x10 <sup>-13</sup> )  | 0.20<br>(1.06x10 <sup>-13</sup> )  | 0.04 (0.09)                        | -0.15<br>(3.79x10 <sup>-8</sup> )  | 0.63<br>(1.00x10 <sup>-13</sup> )  | 0.57<br>(1.00x10 <sup>-13</sup> ) | 1                                 | 0.96 (0.00)                       |
| <b>SDS-DBP</b> | 0.14<br>(2.42x10 <sup>-7</sup> )   | 0.15<br>(7.04x10 <sup>-8</sup> )   | 0.09<br>(2.00x10 <sup>-3</sup> )   | 0.07 (0.01)                        | 0.53<br>(1.00x10 <sup>-13</sup> )  | 0.62<br>(1.00x10 <sup>-13</sup> ) | 0.96 (0.00)                       | 1                                 |
| <b>LDL</b>     | 0.18<br>(1.75x10 <sup>-11</sup> )  | 0.20<br>(1.25x10 <sup>-13</sup> )  | 0.16<br>(4.06x10 <sup>-10</sup> )  | 0.06 (0.03)                        | 0.11<br>(2.40x10 <sup>-5</sup> )   | 0.12 (0.00)                       | 0.07 (0.01)                       | 0.07 (0.01)                       |
| <b>HDL</b>     | -0.36<br>(1.00x10 <sup>-13</sup> ) | -0.30<br>(1.00x10 <sup>-13</sup> ) | -0.20<br>(1.17x10 <sup>-13</sup> ) | -0.07 (0.01)                       | -0.08<br>(2.00x10 <sup>-3</sup> )  | -0.01<br>(0.62)                   | -0.05<br>(0.07)                   | 1.00x10 <sup>-3</sup><br>(0.97)   |
| <b>TC</b>      | 0.08<br>(4.00x10 <sup>-3</sup> )   | 0.10<br>(1.42x10 <sup>-4</sup> )   | 0.09<br>(1.00x10 <sup>-3</sup> )   | 0.02 (0.40)                        | 0.11<br>(4.80x10 <sup>-5</sup> )   | 0.14<br>(7.05x10 <sup>-7</sup> )  | 0.08<br>(3.00x10 <sup>-3</sup> )  | 0.10<br>(1.00x10 <sup>-3</sup> )  |
| <b>TG</b>      | 0.46<br>(1.00x10 <sup>-13</sup> )  | 0.40<br>(1.00x10 <sup>-13</sup> )  | 0.27 (0.00)                        | -0.02 (0.50)                       | 0.22<br>(1.00x10 <sup>-13</sup> )  | 0.16<br>(1.54x10 <sup>-8</sup> )  | 0.13<br>(7.63x10 <sup>-7</sup> )  | 0.07<br>(9.00x10 <sup>-3</sup> )  |
| <b>FG</b>      | 0.13<br>(1.00x10 <sup>-6</sup> )   | 0.09<br>(1.00x10 <sup>-3</sup> )   | 0.04 (0.11)                        | -0.16 (0.00)                       | 0.18<br>(1.08x10 <sup>-11</sup> )  | 0.11<br>(4.00x10 <sup>-4</sup> )  | 0.09<br>(1.00x10 <sup>-3</sup> )  | 0.05 (0.09)                       |
| <b>FI</b>      | 0.62<br>(1.00x10 <sup>-13</sup> )  | 0.46<br>(1.00x10 <sup>-13</sup> )  | 0.29<br>(1.00x10 <sup>-13</sup> )  | -0.07 (0.02)                       | 0.28<br>(1.00x10 <sup>-13</sup> )  | 0.16<br>(5.80x10 <sup>-7</sup> )  | 0.19<br>(1.85x10 <sup>-10</sup> ) | 0.09<br>(6.00x10 <sup>-3</sup> )  |
| <b>HOMA-IR</b> | 0.61<br>(1.00x10 <sup>-13</sup> )  | 0.44<br>(1.00x10 <sup>-13</sup> )  | 0.28<br>(1.00x10 <sup>-13</sup> )  | -0.08<br>(6.00x10 <sup>-3</sup> )  | 0.29<br>(1.00x10 <sup>-13</sup> )  | 0.17<br>(9.20x10 <sup>-8</sup> )  | 0.19<br>(4.51x10 <sup>-11</sup> ) | 0.09<br>(3.00x10 <sup>-3</sup> )  |
| <b>HOMA-B</b>  | 0.56<br>(1.00x10 <sup>-13</sup> )  | 0.40<br>(1.00x10 <sup>-13</sup> )  | 0.25<br>(1.00x10 <sup>-13</sup> )  | -0.05 (0.13)                       | 0.23<br>(1.00x10 <sup>-13</sup> )  | 0.13<br>(2.70x10 <sup>-5</sup> )  | 0.15<br>(2.44x10 <sup>-7</sup> )  | 0.06 (0.04)                       |

Abbreviations: BMI, body mass index; FG, fasting glucose; FI, fasting insulin; HDL, high density lipoprotein cholesterol; HOMA-IR, homeostatic model assessment of insulin resistance; HOMA-B, homeostatic model assessment of beta cell function; LDL, low density lipoprotein cholesterol; SDS, standard deviation scores; TC, total cholesterol; TG, triglycerides. Data are Pearson's correlation coefficient (p-value). P-values of 0.00 indicate that the value is  $< 1.00 \times 10^{-36}$ .



**Supplementary Table S7 Continued: Correlation table for continuous cardio-metabolic traits showing Pearson's correlation coefficient and associated p-values**

|                | <b>LDL</b>                        | <b>HDL</b>                         | <b>TC</b>                         | <b>TG</b>                          | <b>FG</b>                         | <b>FI</b>                          | <b>HOMA-IR</b>                     | <b>HOMA-B</b>                      |
|----------------|-----------------------------------|------------------------------------|-----------------------------------|------------------------------------|-----------------------------------|------------------------------------|------------------------------------|------------------------------------|
| <b>BMI</b>     | 0.18<br>(1.75x10 <sup>-11</sup> ) | -0.36<br>(1.00x10 <sup>-13</sup> ) | 0.08<br>(4.00x10 <sup>-3</sup> )  | 0.46<br>(1.00x10 <sup>-13</sup> )  | 0.13<br>(1.00x10 <sup>-6</sup> )  | 0.62<br>(1.00x10 <sup>-13</sup> )  | 0.61<br>(1.00x10 <sup>-13</sup> )  | 0.53<br>(1.00x10 <sup>-13</sup> )  |
| <b>SDS-BMI</b> | 0.20<br>(1.25x10 <sup>-13</sup> ) | -0.30<br>(1.00x10 <sup>-13</sup> ) | 0.10<br>(1.42x10 <sup>-4</sup> )  | 0.40<br>(1.00x10 <sup>-13</sup> )  | 0.09<br>(1.00x10 <sup>-3</sup> )  | 0.46<br>(1.00x10 <sup>-13</sup> )  | 0.44<br>(1.00x10 <sup>-13</sup> )  | 0.40<br>(1.00x10 <sup>-13</sup> )  |
| <b>WHR</b>     | 0.16<br>(4.06x10 <sup>-10</sup> ) | -0.20<br>(1.17x10 <sup>-13</sup> ) | 0.09<br>(1.00x10 <sup>-3</sup> )  | 0.27<br>(1.00x10 <sup>-13</sup> )  | 0.04 (0.11)                       | 0.29<br>(1.00x10 <sup>-13</sup> )  | 0.28<br>(1.00x10 <sup>-13</sup> )  | 0.25<br>(1.00x10 <sup>-13</sup> )  |
| <b>SDS-WHR</b> | 0.06 (0.03)                       | -0.07 (0.01)                       | 0.02 (0.40)                       | -0.02 (0.50)                       | -0.16<br>(1.01x10 <sup>-9</sup> ) | -0.07 (0.02)                       | -0.08<br>(6.00x10 <sup>-3</sup> )  | -0.05 (0.13)                       |
| <b>SBP</b>     | 0.11<br>(2.40x10 <sup>-5</sup> )  | -0.08<br>(2.00x10 <sup>-3</sup> )  | 0.11<br>(4.80x10 <sup>-5</sup> )  | 0.22<br>(1.00x10 <sup>-13</sup> )  | 0.18<br>(1.08x10 <sup>-11</sup> ) | 0.28<br>(1.00x10 <sup>-13</sup> )  | 0.29<br>(1.00x10 <sup>-13</sup> )  | 0.23<br>(1.00x10 <sup>-13</sup> )  |
| <b>SDS-SBP</b> | 0.12<br>(1.00x10 <sup>-5</sup> )  | -0.01 (0.62)                       | 0.14<br>(7.05x10 <sup>-7</sup> )  | 0.16<br>(1.54x10 <sup>-8</sup> )   | 0.11<br>(1.00x10 <sup>-4</sup> )  | 0.16<br>(1.00x10 <sup>-6</sup> )   | 0.17<br>(9.20x10 <sup>-8</sup> )   | 0.13<br>(2.68x10 <sup>-5</sup> )   |
| <b>DBP</b>     | 0.07 (0.01)                       | -0.05 (0.07)                       | 0.08<br>(3.00x10 <sup>-3</sup> )  | 0.13<br>(7.63x10 <sup>-7</sup> )   | 0.09<br>(1.00x10 <sup>-3</sup> )  | 0.19<br>(1.85x10 <sup>-10</sup> )  | 0.19<br>(4.51x10 <sup>-11</sup> )  | 0.15<br>(2.44x10 <sup>-7</sup> )   |
| <b>SDS-DBP</b> | 0.07 (0.01)                       | 1.00x10 <sup>-3</sup><br>(0.97)    | 0.10<br>(1.00x10 <sup>-3</sup> )  | 0.07<br>(9.00x10 <sup>-3</sup> )   | 0.05 (0.09)                       | 0.09<br>(6.00x10 <sup>-3</sup> )   | 0.09<br>(3.00x10 <sup>-3</sup> )   | 0.06 (0.04)                        |
| <b>LDL</b>     | 1                                 | 0.10<br>(8.10x10 <sup>-5</sup> )   | 0.89 (0.00)                       | 0.42<br>(1.00x10 <sup>-13</sup> )  | 0.28<br>(1.00x10 <sup>-13</sup> ) | 0.08<br>(5.00x10 <sup>-3</sup> )   | 0.12<br>(6.20x10 <sup>-5</sup> )   | 0.03 (0.27)                        |
| <b>HDL</b>     | 0.10<br>(8.10x10 <sup>-5</sup> )  | 1                                  | 0.34<br>(1.00x10 <sup>-13</sup> ) | -0.37<br>(1.00x10 <sup>-13</sup> ) | 0.18<br>(3.61x10 <sup>-12</sup> ) | -0.32<br>(1.00x10 <sup>-13</sup> ) | -0.28<br>(1.00x10 <sup>-13</sup> ) | -0.33<br>(1.00x10 <sup>-13</sup> ) |
| <b>TC</b>      | 0.89 (0.00)                       | 0.34<br>(1.00x10 <sup>-13</sup> )  | 1                                 | 0.38 (0.00)                        | 0.34<br>(1.00x10 <sup>-13</sup> ) | -0.02 (0.55)                       | 0.03 (0.28)                        | -0.08<br>(6.00x10 <sup>-3</sup> )  |
| <b>TG</b>      | 0.42<br>(1.00x10 <sup>-13</sup> ) | -0.37<br>(1.00x10 <sup>-13</sup> ) | 0.38<br>(1.00x10 <sup>-13</sup> ) | 1                                  | 0.20<br>(1.03x10 <sup>-13</sup> ) | 0.41<br>(1.00x10 <sup>-13</sup> )  | 0.42<br>(1.00x10 <sup>-13</sup> )  | 0.33<br>(1.00x10 <sup>-13</sup> )  |
| <b>FG</b>      | 0.28<br>(1.00x10 <sup>-13</sup> ) | 0.18<br>(3.61x10 <sup>-12</sup> )  | 0.34<br>(1.00x10 <sup>-13</sup> ) | 0.20<br>(1.03x10 <sup>-13</sup> )  | 1                                 | 0.16<br>(6.49x10 <sup>-8</sup> )   | 0.29<br>(1.00x10 <sup>-13</sup> )  | 4.00x10 <sup>-4</sup><br>(0.99)    |
| <b>FI</b>      | 0.08<br>(5.00x10 <sup>-3</sup> )  | -0.32<br>(1.00x10 <sup>-13</sup> ) | -0.02 (0.55)                      | 0.41<br>(1.00x10 <sup>-13</sup> )  | 0.16<br>(6.49x10 <sup>-8</sup> )  | 1                                  | 0.98 (0.00)                        | 0.98 (0.00)                        |
| <b>HOMA-IR</b> | 0.12<br>(6.20x10 <sup>-5</sup> )  | -0.28<br>(1.00x10 <sup>-13</sup> ) | 0.03 (0.28)                       | 0.42<br>(1.00x10 <sup>-13</sup> )  | 0.29<br>(1.00x10 <sup>-13</sup> ) | 0.98 (0.00)                        | 1                                  | 0.94 (0.00)                        |
| <b>HOMA-B</b>  | 0.03 (0.27)                       | -0.33<br>(1.00x10 <sup>-13</sup> ) | -0.08<br>(6.00x10 <sup>-3</sup> ) | 0.33<br>(1.00x10 <sup>-13</sup> )  | 4.00x10 <sup>-4</sup><br>(0.99)   | 0.98 (0.00)                        | 0.94 (0.00)                        | 1                                  |

Abbreviations: BMI, body mass index; FG, fasting glucose; FI, fasting insulin; HDL, high density lipoprotein cholesterol; HOMA-IR, homeostatic model assessment of insulin resistance; HOMA-B, homeostatic model assessment of beta cell function; LDL, low density lipoprotein cholesterol; SDS, standard deviation scores; TC, total cholesterol; TG, triglycerides. Data are Pearson's correlation coefficient (p-value). P-values of 0.00 indicate that the value is  $< 1.00 \times 10^{-36}$ .

**Supplementary Table S8: Shapiro-Wilk test for normality of continuous traits before and after inverse normal transformations**

| <b>Trait</b>              | <b>P-value before transformation</b> | <b>P-value after transformation</b> |
|---------------------------|--------------------------------------|-------------------------------------|
| Adiponectin (µg/ml)       | $1.50 \times 10^{-14}$               | $6.21 \times 10^{-1}$               |
| BMI (kg/m <sup>2</sup> )  | $8.71 \times 10^{-20}$               | 1.00                                |
| WHR                       | $2.92 \times 10^{-7}$                | 1.00                                |
| SBP (mmHg)                | $6.69 \times 10^{-13}$               | $8.93 \times 10^{-10}$              |
| DBP (mmHg)                | $7.20 \times 10^{-17}$               | $8.43 \times 10^{-14}$              |
| LDL Cholesterol (mg/dL)   | $5.66 \times 10^{-12}$               | 1.00                                |
| HDL Cholesterol (mg/dL)   | $6.67 \times 10^{-8}$                | $7.55 \times 10^{-1}$               |
| Total cholesterol (mg/dL) | $3.76 \times 10^{-8}$                | 1.00                                |
| Triglycerides (mg/dL)     | $1.93 \times 10^{-32}$               | $9.71 \times 10^{-1}$               |
| Fasting glucose (mmol/L)  | $1.00 \times 10^{-3}$                | $3.02 \times 10^{-1}$               |
| Fasting insulin (mIU/L)   | $5.20 \times 10^{-36}$               | 1.00                                |
| HOMA-IR                   | $6.67 \times 10^{-37}$               | 1.00                                |
| HOMA-B                    | $1.14 \times 10^{-35}$               | 1.00                                |

Abbreviations: BMI, body mass index; DBP, diastolic blood pressure; HDL, high density lipoprotein cholesterol; HOMA-IR, homeostatic model assessment of insulin resistance; HOMA-B, homeostatic model assessment of beta cell function; LDL, low density lipoprotein cholesterol; SBP, systolic blood pressure; WHR, waist-to-hip ratio.

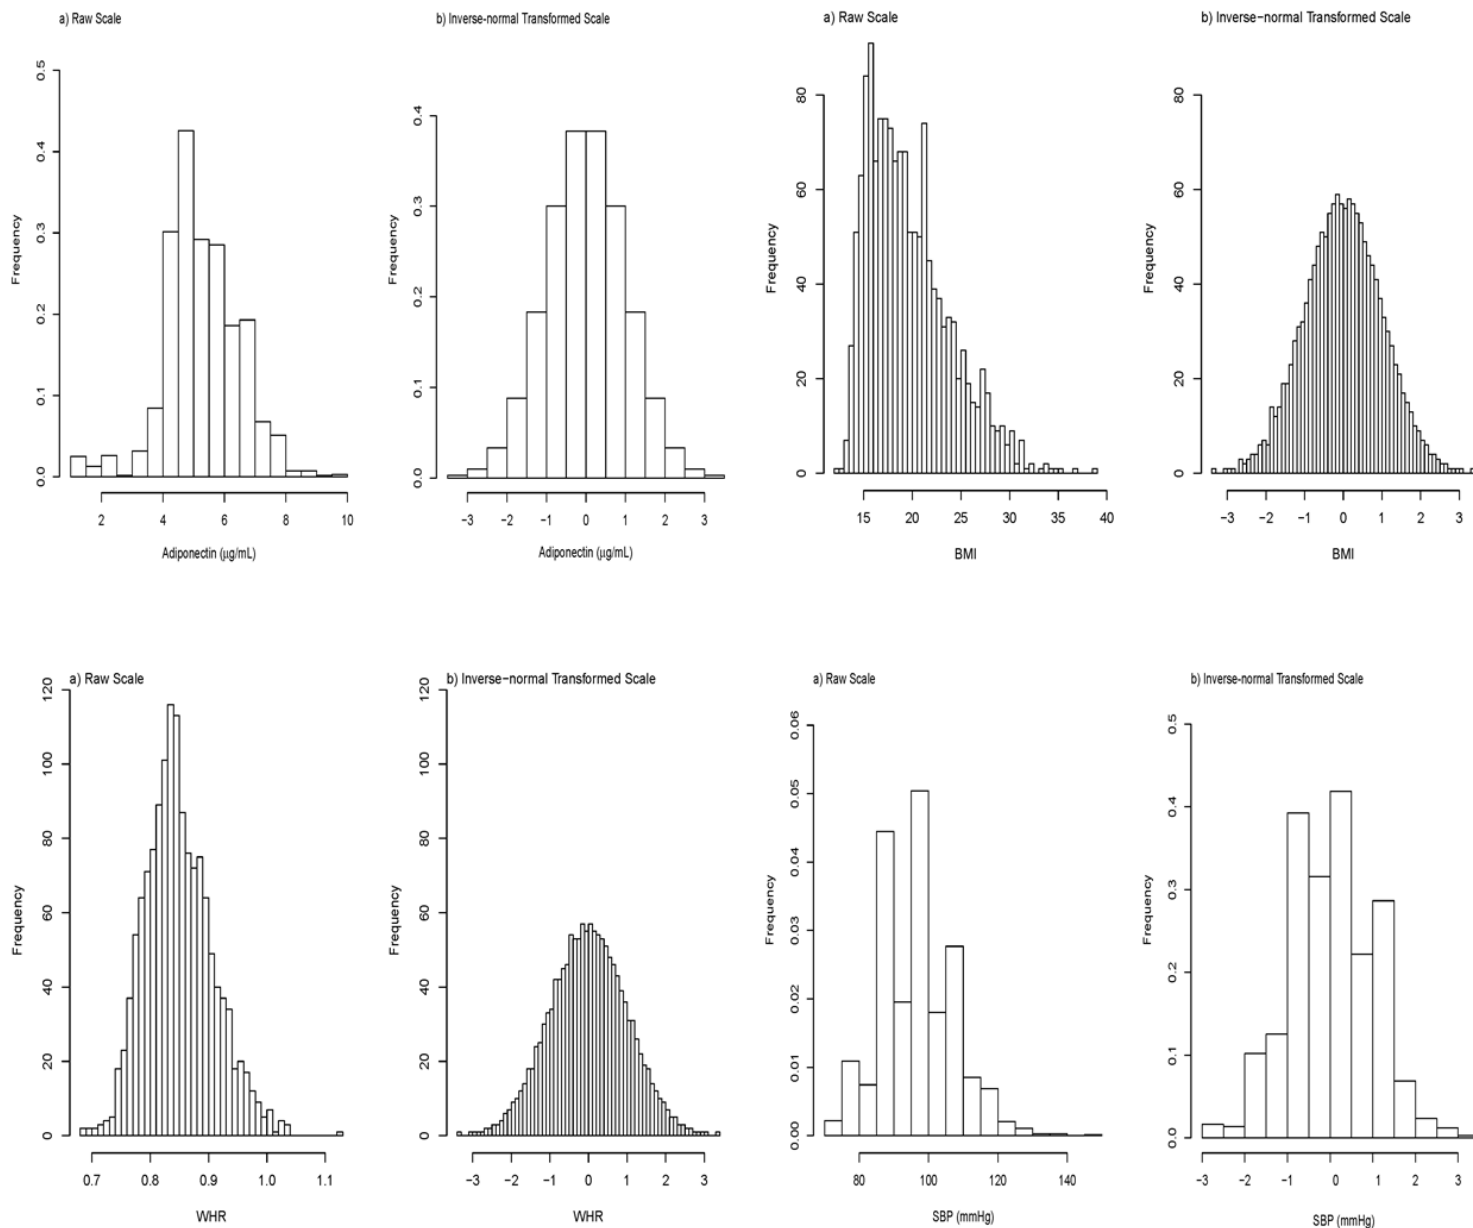

**Supplementary Figure S1: Histograms illustrating raw distribution (panel A) and corrected distributions following inverse normal transformations (panel B) of variables of interest.**

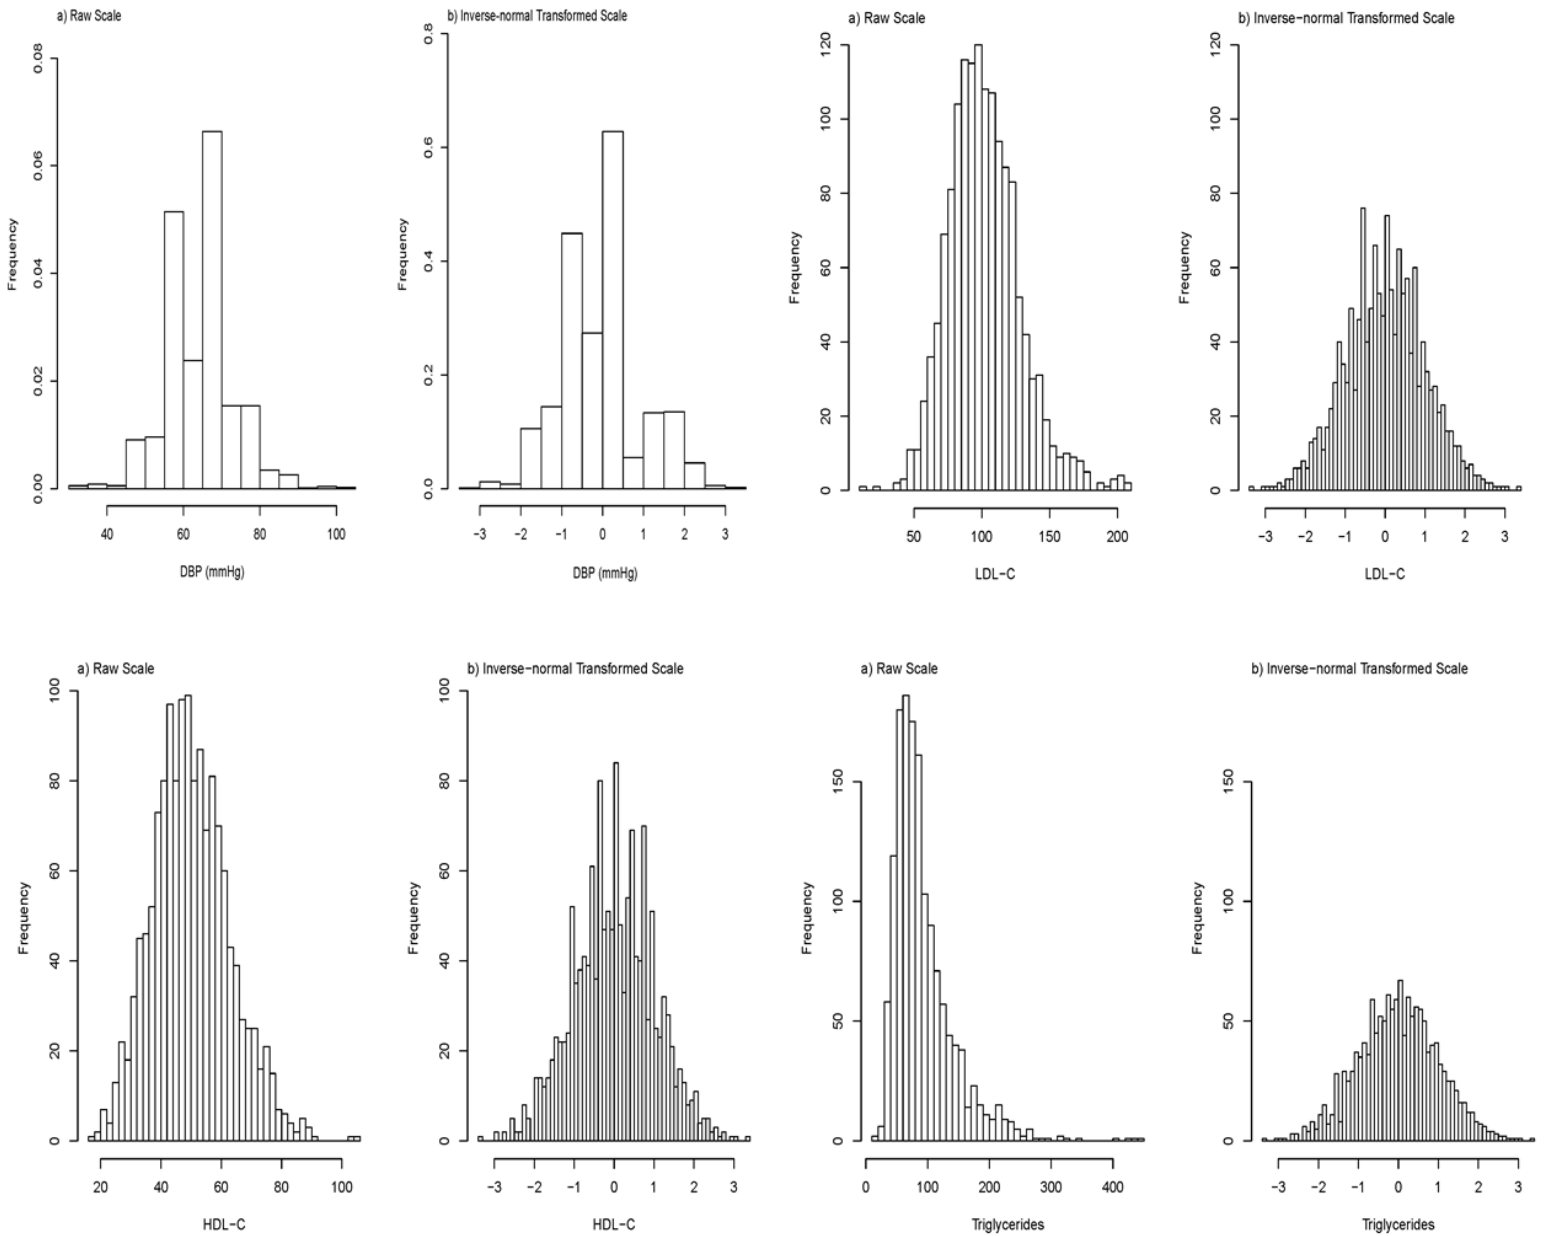

**Supplementary Figure S1 Continued: Histograms illustrating raw distribution (panel A) and corrected distributions following inverse normal transformations (panel B) of variables of interest.**

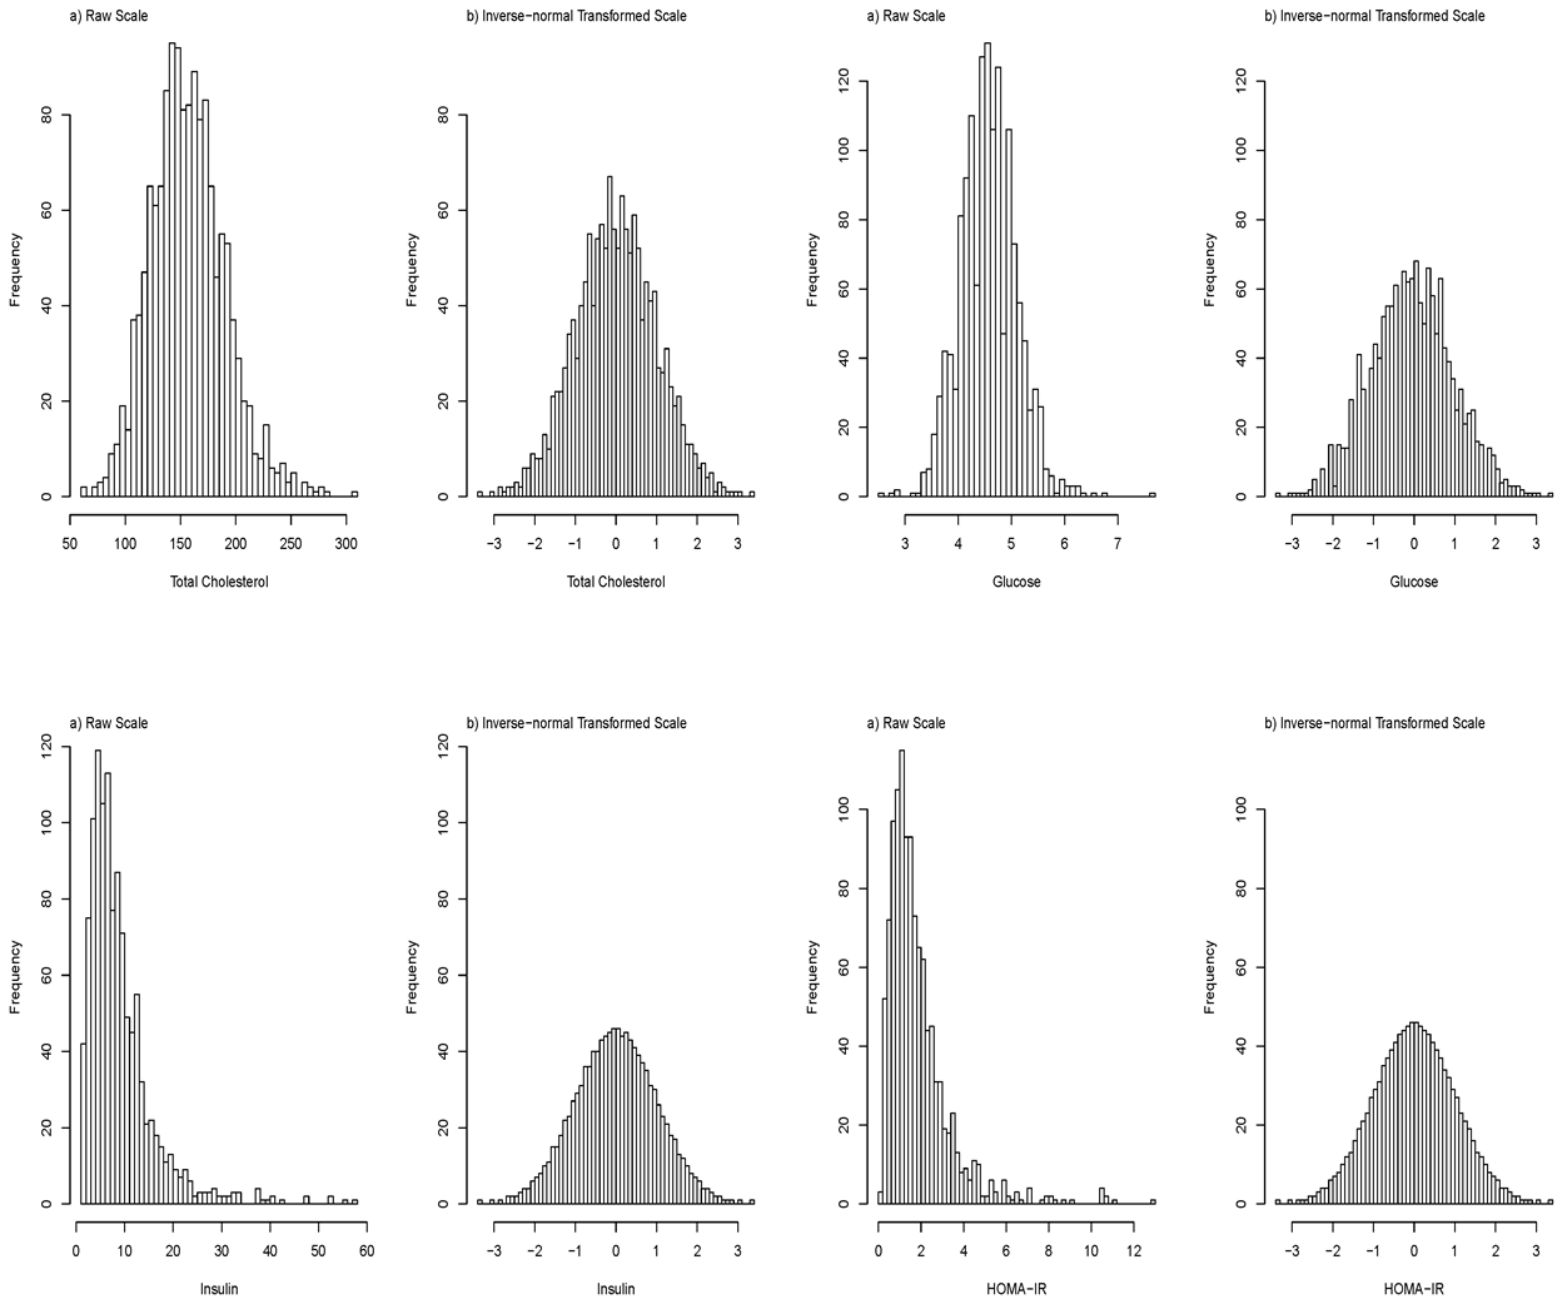

**Supplementary Figure S1 Continued: Histograms illustrating raw distribution (panel A) and corrected distributions following inverse normal transformations (panel B) of variables of interest.**

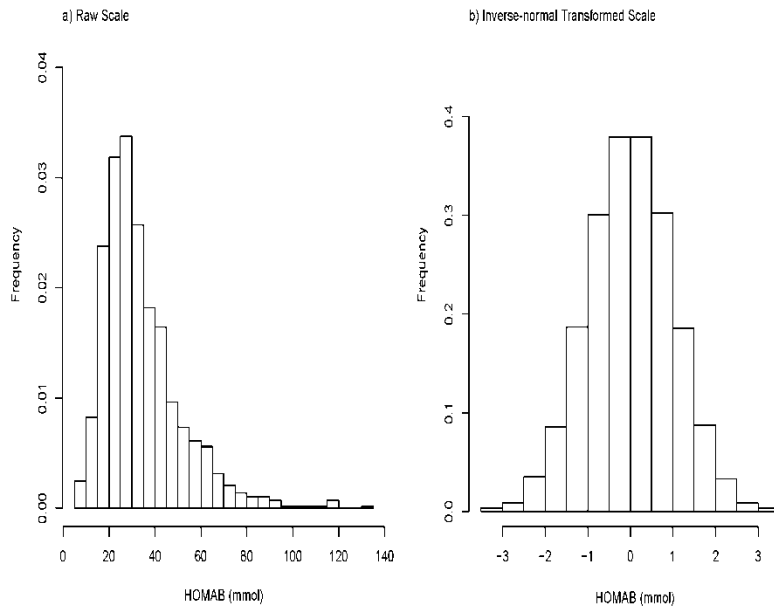

**Supplementary Figure S1 Continued: Histograms illustrating raw distribution (panel A) and corrected distributions following inverse normal transformations (panel B) of variables of interest.**

**Supplementary Figure S1: Histograms illustrating raw distribution (panel A) and corrected distributions following inverse normal transformations (panel B) of variables of interest.**
